# Supplementary material
Source: Springer Nature journal article supplement (https://www.springermedizin.de/resource/supplementary/12937_2010_310_MOESM1_ESM.pdf/25654842)
Supplement: MOESM1 [file 25654842]

**Table 1. Immunomodulatory Glucan Extracts: Oral Animal Studies**

| Source                                                         | Extract                                 | Animal                                      | Dose/day                                             | Duration of study                 | Treatment                                                             | Effects                                                                                                                                                                                                                  | Reference |
|----------------------------------------------------------------|-----------------------------------------|---------------------------------------------|------------------------------------------------------|-----------------------------------|-----------------------------------------------------------------------|--------------------------------------------------------------------------------------------------------------------------------------------------------------------------------------------------------------------------|-----------|
| <i>Agaricus</i><br>( <i>A. blazei</i> )<br><i>subrufescens</i> | $\alpha$ -1,6 and $\alpha$ -1,4 glucans | 8-week ♀ C3H/He mice (5/group)              | 100 mg/kg IG every 3 days                            | 1 month                           | Healthy animals                                                       | ↑ #s splenic T lymphocytes (Thy1.2, CD4+ and CD8+)                                                                                                                                                                       | [24]      |
|                                                                | Aqueous                                 | 7-9-week ♂ Balb/cByJ mice (40/group)        | 1 ml 0.45N, 0.6N, or 3N aqueous extract              | 2 months                          |                                                                       | All doses ↑ serum IgG levels, CD3+ T cell populations and PML phagocytic activity                                                                                                                                        | [22]      |
|                                                                |                                         | 7-9-week male Balb/cByJ mice (40/group)     | 1 ml 0.45N, 0.6N, or 3N aqueous extract              | 10 weeks                          | IP injection of OVA at 4 weeks                                        | 0.6N and 3N ↑ levels of OVA-specific serum IgG 28 days post-immunization; all doses ↑ delayed-type hypersensitivity and TNF- $\alpha$ secreted from splenocytes at 10 weeks; 0.6N ↑ splenocyte proliferation at 10 weeks |           |
|                                                                |                                         | 5-6 -week ♀ BALB/cHsdOla mice (8/group X 2) | One 200 $\mu$ l extract day 1, orogastric intubation | 1 week                            | Injected IP fecal solution day 2                                      | ↓ CFU in blood of mice with severe peritonitis & improved overall survival rate in all peritonitis groups                                                                                                                | [46]      |
|                                                                |                                         | 6-week BALB/c nu/nu mice (7/group)          | 2.5 mg extract days 20-41, drinking water            | 41 days                           | Injected SC Sp-2 myeloma cells day 1                                  | ↓ tumor size & weight after 21 days treatment                                                                                                                                                                            | [65]      |
|                                                                | Aqueous, acid treated                   | 6-week ♀ C57BL/6 mice (10/group)            | 20, 100 or 500 $\mu$ g/ml, drinking water            | 9 days                            | Injected IP human ovarian cancer cells day 1                          | 500 $\mu$ g/ml ↓ tumor weight                                                                                                                                                                                            | [66]      |
|                                                                |                                         |                                             | 20, 100 or 500 $\mu$ g/ml, drinking water            | 3 weeks                           | Injected IV murine lung cancer (3LL) cells                            | 100 & 500 $\mu$ g/ml ↓ #s metastatic tumors                                                                                                                                                                              |           |
| Aqueous, with 200 ng/day $\beta$ -glucan                       | 6-week ♀ BALB/c mice (10/group)         | 200 ng days 5-21                            | 3 weeks                                              | Injected Meth A tumor cells day 1 | ↓ tumor size & weight                                                 | [23]                                                                                                                                                                                                                     |           |
|                                                                |                                         |                                             | 2 weeks                                              | Injected Meth A tumor cells       | ↑ cytotoxic T lymphocyte activity & spleen cell IFN- $\alpha$ protein |                                                                                                                                                                                                                          |           |
|                                                                |                                         | 300 mg                                      | 5 days                                               | Healthy animals                   | ↑ splenic NK cell activity                                            |                                                                                                                                                                                                                          |           |
| <i>Avena</i> spp.                                              | $\beta$ -glucans (particulate)          | 6-7 -week ♀ C57BL/6 mice (7/group)          | 3 mg every 48 h, days 1-3                            | 1 month                           | Oral <i>E. vermiformis</i> oocytes day 10                             | ↓ <i>E. vermiformis</i> fecal oocyte #s; increased intestinal anti-merozoite IgA; ↓ # of IL-4-secreting MLN cells                                                                                                        | [42]      |
|                                                                |                                         |                                             | 3 mg on alternating days, days 1-10                  | 22 days                           | Injected IP <i>Eimeria vermiformis</i> day 10                         | ↓ <i>E. vermiformis</i> fecal oocyte #s; ↑ anti-merozoite intestinal IgA                                                                                                                                                 | [43]      |

|                                    |                            |                                        |                                                                      |          |                                                                                                                                                              |                                                                                                                                                                                                                     |      |
|------------------------------------|----------------------------|----------------------------------------|----------------------------------------------------------------------|----------|--------------------------------------------------------------------------------------------------------------------------------------------------------------|---------------------------------------------------------------------------------------------------------------------------------------------------------------------------------------------------------------------|------|
|                                    | $\beta$ -glucans (soluble) | 4-week ♂ CD-1 mice (24/group)          | 0.6 mg/ml 68% $\beta$ -glucan, drinking water                        | 1 month  | Resting or exercise-stressed (days 8-10) animals administered HSV-1 IN day 10                                                                                | ↓ morbidity in resting and exercise-stressed animals ; ↓ mortality in exercise-stressed animals; pre-infection, ↑ M $\phi$ anti-viral resistance in resting and exercise-stressed animals                           | [38] |
|                                    |                            |                                        | ~3.5 mg days 1-10, drinking water                                    |          | Resting or exercise-stressed (days 5-10) animals administered HSV-1 IN day 10                                                                                | Pre-infection, ↑ M $\phi$ antiviral resistance in resting animals                                                                                                                                                   | [41] |
|                                    |                            | 4-week ♂ CD-1 mice (10/group)          | 0.6 mg/ml 68% $\beta$ -glucan, drinking water                        | 10 days  | Resting animals or animals exposed to a bout of fatiguing exercise days 8-10 or moderate exercise days 5-10, injected IP with thioglycollate on day 10       | ↑ neutrophil mobilization in resting & moderately exercised animals; ↑ neutrophil respiratory burst activity in resting and fatiguing exercised animals                                                             | [37] |
|                                    |                            | 4-week ♂ CD-1 mice (19-30/group)       | 0.8 mg/ml 50% $\beta$ -glucan, days 1-10, drinking water             | 1 month  | Resting or exercise-stressed (days 8-10) animals administered IN clodronate-filled liposomes to deplete M $\phi$ days 8 & 14 & infected IN with HSV-1 day 10 | ↓ morbidity, mortality, symptom severity in exercise-stressed animals, without M $\phi$ depletion                                                                                                                   | [40] |
|                                    |                            | 4-week ♂ CD-1 mice (20/group)          |                                                                      |          | Resting or exercise-stressed (days 8-10) animals administered HSV-1 IN day 10                                                                                | ↓ morbidity in exercise-stressed & resting animals; ↓ mortality in exercise-stressed animals                                                                                                                        | [39] |
| <i>Ganoderma lucidum</i>           | Aqueous                    | 7-week ♂ CD-1 mice (26/group)          | 5% of diet                                                           | 5 months | Injected IM DMH once a week, weeks 1-10                                                                                                                      | ↓ aberrant crypt foci per colon, tumor size, cell proliferation, nuclear staining of $\beta$ -catenin                                                                                                               | [69] |
|                                    |                            | 4-8-week BALB/c mice (10/group)        | 50, 100 or 200 mg/kg, oral                                           | 10 days  | Injected SD Sarcoma 180 cells                                                                                                                                | ↓ of tumor weight was dose dependent: 27.7, 55.8, 66.7%, respectively                                                                                                                                               | [67] |
| <i>Ganoderma lucidum</i> (mycelia) | Aqueous                    | 7-week ♂ F344/Du Crj rats (16/group)   | 1.25% or 2.5% of diet                                                | 6 months | Injected SC AOM once a week, weeks 2-5                                                                                                                       | Both doses ↓ colonic adenocarcinoma incidence; 2.5% ↓ total tumor incidence; both doses ↓ nuclear staining of $\beta$ -catenin and cell proliferation                                                               | [68] |
| <i>Ganoderma tsugae</i>            | Aqueous                    | 8-week ♀ BALB/cByJNarl mice (14/group) | 0.2-0.4% of diet (young fungi); 0.33 or 0.66% of diet (mature fungi) | 5 weeks  | Injected IP OVA days 7, 14, 21; aerosolized OVA twice during week 4                                                                                          | In splenocytes, both doses of both extracts ↑ IL-2 and IL-2/IL-4 ratios, 0.2% young extract and 0.66% mature extract ↓ IL-4; in M $\phi$ , 0.66% mature extract ↑ IL-1 $\beta$ , both doses of both extracts ↑ IL-6 | [53] |

|                           |                                  |                                                          |                                                             |          |                                                                                                                                                                                                                            |                                                                                                                                                                   |      |
|---------------------------|----------------------------------|----------------------------------------------------------|-------------------------------------------------------------|----------|----------------------------------------------------------------------------------------------------------------------------------------------------------------------------------------------------------------------------|-------------------------------------------------------------------------------------------------------------------------------------------------------------------|------|
| <i>Grifola frondosa</i>   | D fraction                       | Mice: 1) ICR, 2) C3H/HeN, 3) CDF <sub>1</sub> (10/group) | 1.5 mg every other day, beginning day 2                     | 13 days  | Implanted SC: 1) Sarcoma-180, 2) MM-46 carcinoma, or 3) IMC carcinoma cells                                                                                                                                                | ↓ tumor weight & tumor growth rate: 1) 58%, 2) 64%, and 3) 75%, respectively                                                                                      | [71] |
|                           |                                  | 5-week ♂ BALB/c mice (10/group)                          | 2 mg, days 15-30                                            | 45 days  | Injected in the back with 3-MCA, day 1                                                                                                                                                                                     | ↓ (62.5%) # of animals with tumors; ↑ H <sub>2</sub> O <sub>2</sub> production by plasma Mφ; ↑ cytotoxic T cell activity                                          | [72] |
| <i>Hordeum vulgare</i>    | β-1,3;1,4 or β-1,3;1,6-D-glucans | Athymic nu/nu mice (4-12/group)                          | 40 or 400 µg IG for 4 weeks                                 | 31 weeks | Mice with human xenografts (SKMel28 melanoma, A431 epidermoid carcinoma, BT474 breast carcinoma, Daudi lymphoma, or LAN-1 neuroblastoma) ± mAb (R24, 528, Herceptin, Rituximab, or 3F8, respectively) therapy twice weekly | 400 µg + mAb ↓ tumor growth & ↑ survival; higher MW ↓ tumor growth rate for both doses                                                                            | [75] |
|                           |                                  | Athymic BALB/c mice                                      | 4, 40, or 400 µg for 3-4 weeks                              | 1 month  | Mice with neuroblastoma (NMB7, LAN-1, or SK-N-ER) xenografts, ± 3F8 mAb therapy twice weekly                                                                                                                               | 40 and 400 µg doses + mAb ↓ tumor growth; 400 µg dose ↑ survival. Serum NK cells required for effects on tumor size                                               | [76] |
|                           | β-1,3;1,4-D-glucans              | C57BL/6 WT and CR3-deficient mice (10/group)             | 0.4 mg for 3 weeks                                          | 100 days | Injected SC RMA-S-MUC1 lymphoma cells day 1 ± IV 14.G2a or anti-MUC1 mAb every 3rd day                                                                                                                                     | ± mAb ↓ tumor diameter; ↑ survival                                                                                                                                | [73] |
|                           | β-glucans                        | ♀ Fox Chase ICR immune-deficient (SCID) mice (9/group)   | 400 µg days 1-29                                            | 50 days  | Mice with human (Daudi, EBV-BLCL, Hs445, or RPMI6666) lymphoma xenografts, ± Rituximab mAb therapy twice weekly                                                                                                            | +mAb ↓ tumor growth and ↑ survival                                                                                                                                | [74] |
| <i>Laminaria digitata</i> | Laminarin                        | ♂ ICR/HSD mice (3/group)                                 | 1 mg                                                        | 1 day    | Healthy animals                                                                                                                                                                                                            | ↑ Mφ expression of Dectin-1 in GALT cells; ↑ TLR2 expression in Peyer's patch dendritic cells                                                                     | [29] |
|                           |                                  | ♂ Wistar rats (7/group)                                  | 5% of diet days 1-4, 10% of diet days 5-25                  | 26 days  | Injected IP <i>E. coli</i> LPS day 25                                                                                                                                                                                      | ↓ liver ALT, AST, and LDH enzyme levels; ↑ ED2-positive cells, ↓ peroxidase-positive cells in liver; ↓ serum monocytes, TNF-α, PGE <sub>2</sub> , NO <sub>2</sub> | [44] |
| <i>Lentinula edodes</i>   | SME                              | 6-week nude mice                                         | 0.1 ml water with 10% SME/10 g body weight days 1-19, 33-50 | 50 days  | Injected SC prostate cancer (PC-3) cells day 1                                                                                                                                                                             | ↓ tumor size                                                                                                                                                      | [80] |

|                                 |                                                                 |                                                    |                                       |                                                                                                 |                                                                                                                                                                         |                                                                                                   |      |
|---------------------------------|-----------------------------------------------------------------|----------------------------------------------------|---------------------------------------|-------------------------------------------------------------------------------------------------|-------------------------------------------------------------------------------------------------------------------------------------------------------------------------|---------------------------------------------------------------------------------------------------|------|
| β-glucans                       | ♀ 3- and 8-week BALB/c mice (15/group)                          | 50, 100 or 250 μg                                  | 1-2 weeks                             | Healthy animals                                                                                 | 250 μg dose ↑ spleen cell IL-2 secretion                                                                                                                                | [27]                                                                                              |      |
|                                 | ♀ 3- and 8-week BALB/c mice (15/group)                          | 50, 100 or 250 μg                                  | 1-2 weeks                             | Injected murine mammary carcinoma (Ptas64) cells into mammary fat pads 2 weeks before treatment | ↓ tumor weight                                                                                                                                                          |                                                                                                   |      |
| Lentinan                        | 6-week ♂ Wistar-Imamichi specific-pathogen free rats (10/group) | 1 mg twice weekly                                  | 1-2 months                            | Healthy animals                                                                                 | ↑ T cell #s, helper-cell #s & helper/suppressor ratio, ↓ suppressor cell level at 4, but not 8 weeks                                                                    | [26]                                                                                              |      |
|                                 | 5-6-week ♂ pre-leukemic AKR mice (10/group)                     | 3 mg, days 1-7                                     | 3 weeks                               | Injected SC K36 murine lymphoma cells day 7                                                     | ↓ tumor weight; ↑ tumor inhibition rate (94%)                                                                                                                           | [82]                                                                                              |      |
|                                 | 5-6-week athymic mice (10/group)                                |                                                    | 5 weeks                               | Injected SC colon cancer (LoVo and SW48, SW480 and SW620, or SW403 and SW1116) cells day 7      | ↓ tumor weight, ↑ tumor inhibition rate (>90%)                                                                                                                          |                                                                                                   |      |
|                                 | ♂ AKR mice                                                      | 3 mg                                               | 1 day                                 | Pre-leukemic mice                                                                               | ↑ serum IFN-α and TNF-α, peak at 4 h and then back to normal at 24 h; ↑ IL-2 and IL-1α, peak at 2 h and back to normal at 24 h; ↑ CD3+ T, CD4+ T, CD8+ T, B lymphocytes | [81]                                                                                              |      |
| <i>Phellinus linteus</i>        | Aqueous, alcohol-precipitated                                   | 6-7-week C57BL/6 mice (10-50/group)                | 200 mg/kg in drinking water           | 1 month                                                                                         | Healthy animals                                                                                                                                                         | ↑ production and secretion of IFN-γ by con A stimulated T cells                                   | [32] |
| <i>Saccharomyces cerevisiae</i> | Scleroglucan                                                    | ♂ ICR/HSD mice (3/group)                           | 1 mg one day before challenge (day 1) | 6 days                                                                                          | IV <i>Staphylococcus aureus</i> or <i>Candida albicans</i> day 2                                                                                                        | ↑ long-term survival                                                                              | [29] |
|                                 | β-1,3;1,6 glucans (particulate)                                 | 3 and 8-week ♀ BALB/c mice (15/group)              | 50, 100 or 250 μg                     | 1-2 weeks                                                                                       | Injected murine mammary carcinoma (Ptas64) cells into mammary fat pads 2 weeks before treatment                                                                         | ↓ tumor weight                                                                                    | [27] |
|                                 | β-1,3-glucan                                                    |                                                    |                                       |                                                                                                 | Healthy animals                                                                                                                                                         | All 3 doses ↑ phagocytic activity of blood monocytes & neutrophils & ↑ spleen cell IL-2 secretion |      |
|                                 |                                                                 | WT or CCD11b <sup>-/-</sup> C57BL/6 mice (2/group) | 0.4 mg for 3 weeks                    | 100 days                                                                                        | Injected SC RMA-S-MUC1 lymphoma cells ± 14.G2a or anti-MUC1 mAb IV injection every 3 <sup>rd</sup> day                                                                  | ↓ tumor diameter when included with mAb; ↑ survival with and without mAb                          | [73] |

|                                       |                  |                                                                           |                                   |           |                                               |                                                                                                                                  |      |
|---------------------------------------|------------------|---------------------------------------------------------------------------|-----------------------------------|-----------|-----------------------------------------------|----------------------------------------------------------------------------------------------------------------------------------|------|
|                                       |                  | C57BL/6mice<br>(4/group)                                                  | 25 mg                             | 1 week    | Healthy animals                               | ↑ # intestinal IELs; ↑ # TCRαβ+, TCR γδ+, CD8+, CD4+, CD8αα+, CD8αβ+ T cells in IELs; ↑ IFN-γ mRNA expression in IELs and spleen | [28] |
| <i>Sclerotinia sclerotiorum</i>       | SSG              | 6-8-week specific pathogen-free ♂ CDF <sub>1</sub> mice (3/group)         | 40 or 80 mg/kg days 1-10          | 2 weeks   | Healthy animals                               | 10 mg dose ↑ acid phosphatase activity of peritoneal Mφ (day 14)                                                                 | [30] |
|                                       |                  |                                                                           | 40, 80 or 160 mg/kg days 2-6      | 35 days   | Implanted SC Metha A fibrosarcoma cells day 1 | 80 mg dose ↓ tumor weight                                                                                                        |      |
|                                       |                  | 6-8-week specific pathogen-free ♂ CDF <sub>1</sub> mice (10/group)        | 40, 80 or 160 mg/kg days 2-11     |           | Injected ID IMC carcinoma cells day 1         |                                                                                                                                  |      |
|                                       |                  | 6-8-week specific-pathogen free ♂ mice of BDF1 and C57BL/6 mice (7/group) | 0.5, 1, 2, or 4 mg days 1-10      | 2-3 weeks | Injected IV Lewis lung carcinoma (3LL) cells  | 2 mg ↓ # of 3LL surface lung nodules at 2 weeks                                                                                  | [83] |
| <i>Sclerotium rofsii</i>              | Glucan phosphate | ♂ ICR/HSD mice (3/group)                                                  | 1 mg                              | 1 day     | Healthy animals                               | ↑ systemic IL-6; ↑ Mφ expression of Dectin-1 in GALT cells; ↑ TLR2 expression in dendritic cells from Peyer's patches            | [29] |
| <i>Trametes (Coriolus) versicolor</i> | PSP              | 6-8-week ♂ BALB/c mice (10/group)                                         | 35 µg days 5-29 in drinking water | 29 days   | Implanted SC Sarcoma-180 cells day 1          | ↓ tumor growth & vascular density                                                                                                | [94] |
